# Supplementary material
Source: Springer Nature journal article supplement (https://www.springermedizin.de/resource/supplementary/12955_2012_1159_MOESM2_ESM.pdf/9559402)
Supplement: MOESM2 [file 9559402]

*In the last month,...*

1. I've felt tired or fatigued
2. I've felt sleepy after getting up in the morning and it's been hard to get going
3. I've felt weak
4. I've found it difficult to walk for a long time
5. I've noticed that I get short of breath when I walk quickly
6. I've had difficulty going up and down stairs
7. I've been irritable
8. I've felt depressed
9. I've been down
10. I've been sad
11. I've been in a bad mood
12. I've slept well
13. I've woken up during the night
14. I've had difficulty falling asleep
15. I haven't been able to remember things
16. I've had difficulty remembering how to do routine activities (e.g., cooking)
17. I've found it hard to concentrate
18. I've been worried when I think about my illness
19. I've been worried, not only about hyperparathyroidism but also its complications
20. I've been worried that I might need an operation
21. I've had kidney stones
22. I've had stomach problems such as burning or gastritis
23. I've been constipated
24. I've had back pain
25. My bones and/or joints have ached
26. I've been able to carry out my activities as normal
27. I've restricted some leisure activities because of the symptoms of the illness
28. The illness has limited what household chores I do
29. The illness has prevented me from making plans for the future (such as holidays,...)
30. I've stopped doing things due to fear they would make my illness worse
31. I've stopped doing things with friends because of my illness
32. I've stopped working because of the illness
33. The illness has prevented me from working
34. I've noticed I find it more difficult to concentrate at work than before
